# Supplementary material for: Virtual Screening and In Vitro Evaluation of PD-1 Dimer Stabilizers for Uncoupling PD-1/PD-L1 Interaction from Natural Products
Source: Molecules. 2020 Nov 13;25(22):5293. doi: 10.3390/molecules25225293 (PMC7696397; doi:10.3390/molecules25225293)
Supplement: Supplementary file 1 [file molecules-25-05293-s001.xls]

## Sheet: 工作表1
Column 2	Smiles	Compound ID	idock score	Total Molweight	cLogP	H-Acceptors	H-Donors	Polar Surface Area	Mutagenic	Tumorigenic	Reproductive Effective	Irritant	Cluster No	Is Representative	Neighbor Similarity FragFp 80%	Neighbor Count	Neighbor	Neighbor Analysis X	Neighbor Analysis Y
eoh\L@@DFC@M@lbbrRTTRQRTTRafRl|zfn^ZjhHHj@b@@@@@@	COc1nc(OCc2cccc(c2C)c2ccccc2)ccc1CNCCNC(=O)C	BMS-202	-9.87	419.523	3.4891	6	2	72.48	none	none	none	none	28	Yes		0		-0.440337	-0.524265
eod\DB@FKGCE`ICZPNdKiAIeY^Y^^]uZZNODljnah@b`XJ@`Jj``@@	COc1cc2c(cc1C(F)(F)F)N(C(=O)Nc1cc(F)cc(-c3cccnc3)c1)CC2	ZINC000000601841	-11.17	431.388	4.7252	5	1	54.46	none	none	none	none	10	Yes		0		-0.844364	-0.121362
eghPF@@@BIHfnlbbbbRRfrRfJfTRSDfc`RQusTaP@AESUUPP@@	Cc1cccc(Oc2coc3cc(OCC(=O)OC4CCCCC4)ccc3c2=O)c1	ZINC000000710142	-11.06	408.449	4.2422	6	0	71.06	none	none	none	none	25	Yes		0		0.771155	0.52522
fc aP@I`IJM\bbbbRRfrRfLtRSIZ\EJ}mRE@@DTp@P@@@	Cc1cccc(Oc2coc3cc(OC(=O)c4cccnc4)ccc3c2=O)c1	ZINC000000921109	-11.29	373.363	3.6282	6	0	74.72	none	none	none	none	36	Yes		0		-0.165393	-0.671062
fmo@P@@JbUIfYeU unUXhwgAfmjPB@@jX@H@@@	O=C(COc1ccc2c(=O)c(-c3ccccc3)coc2c1)c1ccccc1	ZINC000001454787	-11.5	356.376	3.5542	4	0	52.6	none	none	none	none	7	Yes	0.88148 (max of 2)	2	125; 349	0.143321	-0.714639
fcoiA`M^KUk`RAI@TaNPWH[dDfYuvvyVwZYsMV}``JjfjfjjI`j@@	N[C@@H](CC(=O)N1CCn2c(nnc2C(F)(F)F)C1)Cc1cc(F)c(F)cc1F	ZINC000001489478	-9.03	407.317	1.5969	6	1	77.04	none	none	none	none	38	Yes		0		-0.2809	-0.556316
fc h`@DAktXNYEEDheBdbhdlhdfBlxmU{ZjZjjjj`@j@@@	O=C1CC2(CCCC2)CC(=O)N1CCCCN1CCN(c2ncccn2)CC1	ZINC000001530571	-9.94	385.51	1.8451	7	0	69.64	none	none	none	none	23	Yes		0		-0.385692	-0.828289
edVXLJ@IcDf`I@bPXdAIARPrJJJZ[YJIJYJEQISI\RQYU]GW@ppQDUPAEM@@@@`@@@	O=c1oc2cc(OCc3c(F)c(F)c(F)c(F)c3F)ccc2cc1-c1ccc2ccccc2n1	ZINC000001792699	-12.61	469.364	4.9747	4	0	48.42	none	none	none	none	5	No	0.9708	1	327	-0.434358	0.520725
egdXLL@NiOL`HcbPZBLbbbTUTRTrTJbRRS@c`RQPtqutADT@QSTt@@`@@@	O=c1oc2cc(OCc3c(F)cccc3Cl)ccc2cc1-c1nc2ccccc2s1	ZINC000001797719	-11.19	437.877	4.8147	4	0	76.66	none	none	none	none	18	No	0.96951 (max of 4)	4	32; 173; 291; 87	0.305405	-0.0218516
ehZXLF@LMCB`@bZPvdKiCzPAdLdTTtRTRJrVRTTTtvphT\l|RrN^i`dFb@J`bHj@@@@	O=c1oc2cc(OCc3c(F)c(F)c(F)c(F)c3F)ccc2cc1-c1nc2ccccc2s1	ZINC000001797720	-12.2	475.392	4.6119	4	0	76.66	none	none	none	none	18	No	0.97605 (max of 4)	4	133; 87; 32; 173	0.443564	0.24024
fc @P@@JbeIfYeU U^YVJMypU{Zd@`@Jj@``@@@	COc1ccc(-c2coc3cc(OCc4ccccc4C)ccc3c2=O)cc1	ZINC000002102927	-10.11	372.419	4.2863	4	0	44.76	none	none	none	none	4	Yes	0.91525 (max of 2)	2	169; 356	-0.0127889	-0.7164
ffcP`@DA@UIeeU{e_YZ\ENVhHHdHBb@@@	COc1ccc2c(CCNC(=O)c3ccccc3)c[nH]c2c1	ZINC000002127348	-9.88	294.353	2.916	4	2	54.12	none	none	none	none	8	Yes	0.82667 (max of 3)	3	129; 249; 53	0.396943	-0.208156
ec`RD@@IGDl`KLdTbQRRRfRVRTRSGBfegdRRvuUT@T@ET@@P@@@	CC1(C)Cc2nc3oc4c(NCCc5ccccc5)ncnc4c3cc2CO1	ZINC000002129896	-10.48	374.443	3.402	6	1	73.07	none	none	none	none	31	Yes		0		-0.523364	-0.800792
e`RZD@@IGLfa`NLbbbTRJbbRTVRjTRS@dUQSWPswsTsU@@D@u@AA@@@	O=C1CC(c2ccccc2)CC(=O)C1=CNc1ncnc2c1ncn2Cc1ccccc1	ZINC000002132574	-11.2	423.475	3.4585	7	1	89.77	none	none	none	none	50	Yes		0		0.844111	-0.155192
ek`PN@@@E@dbnilbbbbbRRvfRVTLRXTL|\bvNZd@`@bjffhD@@	COc1ccc(-c2coc3cc(OC(=O)c4ccco4)ccc3c2=O)cc1OC	ZINC000002154952	-10.32	392.362	3.1435	7	0	84.2	none	none	none	none	45	Yes		0		-0.644194	0.700902
e`RPFH@AE@jmg`HaIe]mYVuWe[VacrKHiXy{z@BZ`BJV@HjBH@@	O=C(COc1ccc2c(=O)c(-c3ccc4c(c3)OCCO4)coc2c1)c1ccc(Cl)cc1	ZINC000002199174	-10.6	448.857	4.139	6	0	71.06	none	none	none	none	7	No	0.88148	1	169	0.281711	-0.547817
fc aQ@FjmfnpQAHaIf]vV]W[eV\LzJU{``IjX@ijj@`PD`	O=C1/C(=C/c2ccc(Cl)c(Cl)c2)Oc2cc(OC(=O)N3CCOCC3)ccc21	ZINC000002406090	-11.61	420.247	4.4818	6	0	65.07	none	none	none	none	19	No	1	1	115	-0.0108195	0.664716
e`\PBJ@CDnm`I@bPXdAIARPRYf{}YVuWfUxdbrjZn~`bHj`BJVBB@`@@	COc1ccccc1-c1coc2cc(OCc3c(F)c(F)c(F)c(F)c3F)ccc2c1=O	ZINC000002441804	-11.32	448.342	4.4464	4	0	44.76	none	none	none	none	4	No	0.91525	1	349	-0.0441312	-0.545123
ekhXLD@FaGD`HbhHrJIKIJIJYJEQIIJabsrKKh[Xz@Bh@bfih@A@@@	O=c1oc2cc(OCc3ccc(Cl)cc3)ccc2cc1-c1nc2ccccc2s1	ZINC000002667111	-10.86	419.887	4.7139	4	0	76.66	none	none	none	none	18	No	0.96951 (max of 4)	4	133; 32; 173; 291	0.274977	0.23206
egdXLL@LMCB`@bZPndLdTTtRTRJrVRTTVvEBcegbVVquLD`tPATDAP@@@@	O=c1oc2cc(OCc3ccc(F)cc3F)ccc2cc1-c1nc2ccccc2s1	ZINC000002667154	-11.59	421.422	4.3095	4	0	76.66	none	none	none	none	18	Yes	0.97605 (max of 4)	4	133; 87; 291; 32	0.200955	0.0934031
ek`XD@HC@@cIRYfUW}nUvUdLtljZvNZ@@@JX@H@@@@@	O=C(C[n+]1ccc(C(=O)c2ccccc2)cc1)c1ccc(-c2ccccc2)cc1	ZINC000003062896	-11.11	378.45	0.3339	3	0	38.02	none	none	none	none	2	No	0.94444	1	12	0.350694	0.548745
fcoP`@DYAWHheDdeidhTeMDeKW`kvuAA@@US@@@@@	O=C(NCCc1cccc(CCNC(=O)c2ccccc2)c1)c1ccccc1	ZINC000003845101	-11.38	372.467	4.2336	4	2	58.2	none	none	none	none	14	No	0.85714	1	184	0.0398569	-0.404463
fcoP`@DYAUIeeU{WU[eYZ|E^vhHH@BjX@@@@@	O=C(NCCc1ccc(CCNC(=O)c2ccccc2)cc1)c1ccccc1	ZINC000003845567	-11.61	372.467	4.2336	4	2	58.2	none	none	none	none	14	Yes	0.85714	1	224	0.257971	-0.268037
fegP`@MU@GHhhddmDdhceDdIWdcftBDA@pp@@@QRS@	O=C(/C=C/c1ccccn1)c1ccc(C(=O)/C=C/c2ccccn2)cc1	ZINC000004007398	-10.46	340.381	3.0542	4	0	59.92	none	none	none	none	16	Yes		0		0.145788	0.707861
eodPF@@@BIHfnlbbbbRRfrRfJfRbRXdt\BRn^ZdJ@@HjZ`@`@@@	Cc1cccc(Oc2coc3cc(OCC(=O)OCc4ccccc4)ccc3c2=O)c1	ZINC000004029157	-11.12	416.428	4.1046	6	0	71.06	none	none	none	none	24	Yes		0		-0.825684	0.0357945
e`RTB@@JJ`DAilbbTVTTRRVJTRbLRQECdPRWTswsUM@@@Dtm@@a@BEEe@	O=C1OC(c2ccccc2)=N/C1=C\c1ccc(/C=C2/N=C(c3ccccc3)OC2=O)cc1	ZINC000004701229	-12.57	420.423	3.524	6	0	77.32	none	none	none	none	39	Yes		0		-0.841248	0.194517
ehVZD@@NIMGJ`FDieY~U[UgU{WBa`Qspkj[[xFjjjjTH@@`@J`BHIaBIQ@@	c1ccc(-c2ccc(CN[C@H]3CO[C@@H]4[C@@H](n5cc(-c6ccccn6)nn5)CO[C@H]34)cc2)cc1	ZINC000005396674	-11.06	439.518	2.2587	7	1	74.09	none	none	none	none	17	No	0.90526	1	278	0.0731147	-0.828624
ed^RD@@NIMG@FDieY~U[U^UYwphXD\|JZv^AajjjjeBBJjB@jHH`fDHeD@@	c1ccc(-c2ccc(CN[C@H]3CO[C@@H]4[C@@H](n5cc(CC6CCCCC6)nn5)CO[C@H]34)cc2)cc1	ZINC000005413137	-10.58	458.604	3.576	6	1	61.2	none	none	none	none	17	Yes	0.90526	1	355	0.231307	-0.837234
edVRLL@CJnam@d`IABPpdLbdLRVTrbbRJTRTtrPddRVQRqpLMT@DuUUT@P@APDVIrQHi@@	O=C(N[C@H]1CO[C@@H]2[C@@H](Nc3nccc(-c4ccccc4)n3)CO[C@H]12)c1ccc(C(F)(F)F)cc1	ZINC000005433806	-10.83	470.45	2.8974	7	2	85.37	none	none	none	none	22	No	0.96063 (max of 8)	8	4; 232; 187; 103; 111; 181; 68; 27	-0.723592	-0.208277
ehZRD@@NIKG@FLdTRTVrTTRRTqdUbRphXDRjJz~Ajjjj@@@bj@B`BHIaBIQ@@	CC(C)(C)c1ccnc(N[C@H]2CO[C@@H]3[C@@H](NCc4ccc(-c5ccccc5)cc4)CO[C@H]23)n1	ZINC000005433912	-10.35	444.577	3.5116	6	2	68.3	none	none	none	none	22	No	0.90987 (max of 7)	7	187; 232; 103; 111; 273; 27; 68	-0.837494	-0.282584
ehZRBL@CJnam@dk`IABPpdLbdLRVTrbbRJTRTtrDdbRrJVN~Aj`@fjjj`BIhhRKDyHdT`@	O=C(N[C@H]1CO[C@@H]2[C@@H](Nc3nccc(-c4ccco4)n3)CO[C@H]12)c1ccc(C(F)(F)F)cc1	ZINC000005433926	-10.8	460.411	2.1231	8	2	98.51	none	none	none	none	22	No	0.94595 (max of 7)	7	181; 68; 27; 273; 111; 103; 232	-0.813345	-0.426872
ed^RL@@FEMB`OHldTRaRaTTRQRTRVTRQEDb`TRVRvpLMR`AUUUT@D@DTAAbl`RrP@	c1ccc(-c2ccc(CN[C@H]3CO[C@@H]4[C@@H](Nc5nccc(-c6ccco6)n5)CO[C@H]34)cc2)cc1	ZINC000005433939	-11.41	454.528	2.8516	7	2	81.44	none	none	none	none	22	Yes	0.99167 (max of 7)	7	187; 232; 103; 111; 273; 181; 68	-0.586874	-0.452422
ehZRLL@CJnam@d`IABPpdLbdLRVTrbbRJTRTLRDdbRrJVv~Aj`@fjjj`@jhhbKDyHdT`@	O=C(N[C@H]1CO[C@@H]2[C@@H](Nc3nccc(C4CCCC4)n3)CO[C@H]12)c1ccc(C(F)(F)F)cc1	ZINC000005433978	-10.08	462.471	2.996	7	2	85.37	none	none	none	none	22	No	0.96063 (max of 7)	7	232; 187; 103; 181; 68; 27; 273	-0.707467	-0.521356
ed^RDH@FEMBoH`@cIEDhThUEDdTeDeeDdQQHhEDedmlCCTh@UUUU@A@AE@PXkHDld@@	c1ccc(-c2ccc(CN[C@H]3CO[C@@H]4[C@@H](Nc5nccc(-c6cccs6)n5)CO[C@H]34)cc2)cc1	ZINC000005439107	-11.38	470.595	3.6494	6	2	96.54	none	none	none	none	22	No	0.99167 (max of 7)	7	181; 68; 27; 273; 111; 103; 187	-0.783159	-0.557467
ehZZLH@ACKFihla`ICHhdiidhUEDdTidhdjNMCDlbjo`X@`@JjjjZ`@B`aq^QIUH@	O=C(NCc1ccccc1)N[C@H]1CO[C@@H]2[C@@H](Nc3nccc(-c4cccc(F)c4)n3)CO[C@H]12	ZINC000005440358	-10.43	449.485	1.8532	8	3	97.4	none	none	none	none	57	Yes	0.84064 (max of 3)	3	68; 273; 103	-0.447305	-0.354698
fco@P@@NBMIfUVyn_~YqZRU^v`PhAhD``@@HiI`	O=C(/C=C/c1ccccc1O)c1cccc(C(=O)/C=C/c2ccccc2O)c1	ZINC000005583254	-11.46	370.403	4.2566	4	2	74.6	none	none	none	none	34	Yes		0		-0.718337	0.278822
eolXLD@FaOL`IBRPrJJII[QISIPjIJYIcapIHjYZyz@`j@Hih@@@D@@@	O=c1oc2cc(OCc3ccc(F)cc3F)ccc2cc1-c1ccc2ccccc2n1	ZINC000008690002	-11.99	415.394	4.6723	4	0	48.42	none	none	none	none	5	Yes	0.9708	1	38	-0.278328	0.573396
fmoh`@DJmEXIILjkLkNoN}g^bWlumUULtE@@@p@@@	O=C(CCc1nc(-c2ccncc2)no1)NCCc1c[nH]c2ccccc12	ZINC000008764812	-10.29	361.404	2.2567	7	2	96.7	none	none	none	none	56	No	1 (max of 2)	2	20; 96	-0.690787	0.575195
fmoh`@DJmDXIILjkLkNoN}g^bWlumUULtE@@@p@@@	O=C(CCc1nc(-c2cccnc2)no1)NCCc1c[nH]c2ccccc12	ZINC000008764856	-10.26	361.404	2.2567	7	2	96.7	none	none	none	none	56	Yes	1 (max of 2)	2	20; 332	-0.75574	0.608951
fc h`@DVCFXCYEDddeEEDddUidgAbdkU{ZjjfPjB@@d@@@	O=C(CCCc1nc(-c2cccnc2)no1)NCCc1c[nH]c2ccccc12	ZINC000008764881	-10.19	375.431	2.7111	7	2	96.7	none	none	none	none	56	No	0.9558 (max of 2)	2	96; 332	-0.805431	0.489566
figp`@DFjCVQQIQIJHyJJIKTXjvZ}FuHPLURDAD@@@	O=C(NCCc1c[nH]c2ccccc12)c1cc(=O)[nH]c2ccccc12	ZINC000008765154	-10.72	331.374	1.5903	5	3	73.99	none	none	none	none	33	Yes		0		-0.633459	-0.753312
figp`@DTrCnQQJIIIJIJHkKBexL\uZuSUAHA@TD@@@	COc1ccc2[nH]cc(CCNC(=O)c3cc4ccccc4[nH]3)c2c1	ZINC000008765456	-9.79	333.39	3.0094	5	3	69.91	none	none	none	none	12	Yes	0.94444 (max of 7)	7	205; 222; 149; 202; 117; 295; 213	-0.624981	-0.0819734
ek`ZD@@DFKHf`MLbbbRRtTrTRRUbRDTRJjZvNZjjfjiih@J`@@	O=C(CCCc1ccccc1)NCC(=O)N1CCC2(CC1)NCCc1[nH]cnc12	ZINC000008791928	-10.98	395.505	1.7898	7	3	90.12	none	none	none	none	52	Yes		0		0.650979	0.72603
eghRL@@DLHl`NDlbbbRVRbTRbQVfRQCGdUWQusUSUSALDUUTTCB@@	O=C(CC[C@@H]1NC(=O)N(CCc2c[nH]c3ccccc23)C1=O)NC1CCCCCC1	ZINC000008879166	-9.98	410.516	2.8334	7	3	94.3	none	none	none	none	54	No	0.98239 (max of 2)	2	166; 157	0.0908499	0.335085
figQ`@DYASnQQJIIIJIJHkKBexL\uZuSUAHA@TD@@@	COc1ccc2[nH]cc(CCNC(=O)c3cc4ccccc4o3)c2c1	ZINC000008879403	-9.8	334.374	3.4216	5	2	67.26	none	none	none	none	12	No	0.96809 (max of 5)	5	205; 222; 202; 31; 295	-0.512274	0.0311184
fmoQ`@CYAqNQQQJIYJYIQGQILyKTRsVtCADDCD@D@@@	O=C(Nc1ccccc1)Nc1ccc2oc(-c3ccccc3)cc(=O)c2c1	ZINC000009659980	-12.07	356.38	4.5142	5	2	67.43	none	none	none	none	21	Yes	0.99231 (max of 4)	4	208; 207; 200; 42	-0.21393	-0.110768
fc Q`@CEAsNQQQJIYJYQJJzIIgIZSU^v`XH`bFH@H@@@	Cc1ccccc1-c1cc(=O)c2cc(NC(=O)Nc3ccccc3)ccc2o1	ZINC000009660027	-11.28	370.407	4.8581	5	2	67.43	none	none	none	none	21	No	0.97761 (max of 4)	4	208; 207; 270; 42	0.00226384	-0.149386
fc Q`@CYAqNQQQJIYJYIQPfIIgIZbU^v`XH``Xh@H@@@	Cc1cccc(-c2cc(=O)c3cc(NC(=O)Nc4ccccc4)ccc3o2)c1	ZINC000009660028	-11.99	370.407	4.8581	5	2	67.43	none	none	none	none	21	No	0.99231 (max of 4)	4	270; 42; 200; 207	-0.0487436	-0.287133
fc Q`@CYAqNQQQJIYJYIQEJYIgIZbU^v`XH``Xh@H@@@	Cc1ccc(-c2cc(=O)c3cc(NC(=O)Nc4ccccc4)ccc3o2)cc1	ZINC000009660029	-11.94	370.407	4.8581	5	2	67.43	none	none	none	none	21	No	0.96992 (max of 4)	4	208; 270; 42; 200	-0.190039	-0.257999
fc Qb@DuxxhIAIfV]yWumeVRtXLU{``dhDBf`@H@@@	O=C(Nc1ccccc1)Nc1ccc2oc(-c3ccccc3F)cc(=O)c2c1	ZINC000009660059	-12.33	374.37	4.615	5	2	67.43	none	none	none	none	21	No	0.97761 (max of 4)	4	208; 207; 200; 270	-0.110277	-0.0350976
e`RTLL@AimHj`IABPpdLbdLTRQTRTrTJbRRTb`RQSRvswuTAAPAEMMP@B@@@	O=c1oc2cc(OCc3ccccc3C(F)(F)F)ccc2cc1-c1nc2ccccc2[nH]1	ZINC000011867637	-11.78	436.388	4.4381	5	1	64.21	none	none	none	none	18	No	0.83598 (max of 4)	4	133; 87; 291; 173	0.409583	0.0796804
fc PR@DJIIIPQBSKjvrnwJjdixK^kwMMSP@SSPA@@@@	O=C(CCc1cc(Cl)no1)Nc1ccc(C(=O)c2cc3ccccc3o2)cc1	ZINC000012410018	-11.53	394.813	4.0629	6	1	85.34	none	none	none	none	46	Yes	0.97727	1	54	-0.734438	-0.662027
ek`XF@@F`BIHjidfYeUoUwmYVIMG@dmcfiB`@BJZijA@@@	COc1ccc2c(=O)c(Oc3ccc(C(=O)NCc4ccco4)cc3)coc2c1	ZINC000012442534	-10.09	391.378	2.8303	7	1	87	none	none	none	none	47	Yes		0		-0.833508	0.349611
e`RZD@@DMDjo`HdfVYU]^YUwmUKMCJfaegofhJBbjPhH@@dDBDX`@	CN1C[C@@H](NC(=O)c2ccc(-c3ccccc3)cc2)C[C@H]1c1nc(-c2ccncc2)no1	ZINC000012529828	-11.11	425.491	3.2511	7	1	84.15	none	none	none	none	26	No	0.97586 (max of 9)	9	217; 197; 128; 107; 311; 146; 214; 61; 336	0.729423	-0.674202
eolRDH@IKDlaH`IAIe]meWevUmZFKGLbiekgh@IjjjZ`@@BPPTSb@@	CN1C[C@@H](NC(=O)c2ccc(F)cc2)C[C@H]1c1nc(-c2ccc3ccccc3c2)no1	ZINC000012529886	-11.2	416.455	3.888	6	1	71.26	none	none	none	none	26	No	0.97586 (max of 9)	9	217; 336; 197; 296; 61; 214; 146; 311; 107	0.629026	-0.751098
fc h`@DXUxHGYEDeEDbmDlhdideZCEoU{Zjjjij@@@dDDVd@	CC(C)NC(=O)N[C@H]1C[C@@H](c2nc(-c3ccc4ccccc4c3)no2)N(C)C1	ZINC000012529904	-10.63	379.463	2.838	7	2	83.29	none	none	none	none	26	No	0.96181 (max of 9)	9	217; 197; 296; 61; 128; 107; 311; 146; 336	0.569002	-0.621335
ek`ZDD@FEGLbiD`I@zPRYV~vU^WYWhx\|JjVv`BIjjjZ`@bQCQ^H@	CN1C[C@@H](NC(=O)Nc2cccc(F)c2)C[C@H]1c1nc(-c2ccc(F)cc2)no1	ZINC000012529980	-10.97	399.4	2.7883	7	2	83.29	none	none	none	none	26	Yes	0.94603 (max of 9)	9	217; 197; 296; 61; 214; 128; 107; 311; 336	0.586388	-0.481707
figI`@DX|L@diLsKKk \jQaoNCt[UTuUUMUUUAd@@	O=C(C1CCNCC1)N1CCN2C(=O)N(C3CCCCC3)C(=O)[C@H]2C1	ZINC000012605073	-9.64	348.445	0.8562	7	1	72.96	none	none	none	none	29	Yes		0		-0.568244	-0.592626
ek`RL@@DLHl`NDlbbbRVRbTRbQVfRHX|bjzvNZjZjXI`bjjJAa@@	O=C(CC[C@@H]1NC(=O)N(CCc2c[nH]c3ccccc23)C1=O)NC1CCCCC1	ZINC000012893501	-10.12	396.489	2.4914	7	3	94.3	none	none	none	none	54	Yes	0.98577 (max of 2)	2	199; 166	0.0698166	0.162406
fc I`@DXcdGDyEEDdleDheDbmLbL}FoU{ZjZjXI`bjhhLP@	O=C(CC[C@@H]1NC(=O)N(CCc2c[nH]c3ccccc23)C1=O)NC1CCCC1	ZINC000012894930	-10.03	382.462	2.1494	7	3	94.3	none	none	none	none	54	No	0.98577 (max of 2)	2	199; 157	-0.0460471	0.254645
fmoPP@CU@cT|bbTTRTqrTTRVVhIUluzMjB`XjdHBhbAD@	COc1ccc2[nH]cc(CCNC(=O)[C@@H]3Cc4ccccc4C(=O)O3)c2c1	ZINC000012900626	-9.95	364.4	2.259	6	2	80.42	none	none	none	none	40	Yes		0		-0.538244	0.605429
fc H`@DT\LElbbTRRRTRqRbbRpi^BtZ}mTuPLETa@A@@@	O=C(CCNC(=O)c1cc2ccccc2[nH]1)NCCc1c[nH]c2ccccc12	ZINC000012900838	-10.4	374.443	2.6175	6	4	89.78	none	none	none	none	51	Yes	0.95758 (max of 5)	5	167; 222; 31; 117; 202	-0.430546	0.20569
fmoH`@DTutBlbbTRRbVRQTTRVEKpZ}fmjfi``jP`@`@@	O=C(CNC(=O)c1cc2ccccc2[nH]1)NCCc1c[nH]c2ccccc12	ZINC000012901074	-10.11	360.416	2.1631	6	4	89.78	none	none	none	none	51	No	0.95758 (max of 7)	7	167; 205; 222; 149; 202; 295; 31	-0.585822	0.165373
edVTJ@@Fg`BIHjdfYeUoUwmVYWXdt\BRN^AaZdJ@@HijiB@``@@	COc1ccc2c(=O)c(Oc3ccc(C(=O)NCCc4c[nH]c5ccccc45)cc3)coc2c1	ZINC000012901216	-10.97	454.481	4.1111	7	2	89.65	none	none	none	none	49	Yes	0.95604 (max of 2)	2	341; 315	0.462778	-0.0677258
edVTB@@Jg`EHbdfYfUW Vv^YWXTL|\BN^AaZd@`@JfjiB@`bAj@@	C[C@H](Cc1c[nH]c2ccccc12)NC(=O)COc1ccc2c(=O)c(-c3ccccc3)coc2c1	ZINC000012902658	-11.32	452.509	3.9249	6	2	80.42	none	none	none	none	41	Yes		0		-0.331523	-0.215273
figH`@DV]TAlbbTRbRbbT|RVUXsluzMjBHhZdH@h@@	Cc1cc(C(=O)NCCc2c[nH]c3ccccc23)c2c(C)noc2n1	ZINC000012923670	-9.96	334.378	2.791	6	2	83.81	none	none	none	none	11	No	0.87143	1	53	0.433878	-0.6906
eg`TB@@LN`DLflbbRbbfRRtlVfTRU`WdQusUT@@@USP@@HDII@@	C[C@H](OC(=O)Nc1ccccc1)c1cccc([C@@H](C)OC(=O)Nc2ccccc2)c1	ZINC000013402578	-10.98	404.465	4.883	6	2	76.66	none	none	none	none	37	Yes		0		-0.13527	-0.405879
feg@`@@NRYeUn[]~UEjNQsZAB`FAH@@@HiQ`	O=C(/C=C/c1ccccc1)c1cccc(C(=O)/C=C/c2ccccc2)c1	ZINC000013402971	-11.06	338.405	4.948	2	0	34.14	none	none	none	none	1	Yes		0		-0.291437	-0.389451
egdTD@@EL`NdfYeUwUU^yVPsRpJHjhzyhJBb@JjX@@HPpQR@@	O=C(c1ccccc1)[C@@H]1CNc2cc3c(cc2C1)C[C@@H](C(=O)c1ccccc1)CN3	ZINC000013403082	-11.34	396.489	3.3404	4	2	58.2	none	none	none	none	13	Yes		0		-0.506254	0.754718
el^TJH@ACGJimhPHcHhdieBdihdleEEidljFAILbmco`X@JZi`@jV`@hb@@@	COc1ccc2c(=O)c(Oc3ccc(C(=O)NCCc4c[nH]c5ccc(Cl)cc45)cc3)coc2c1	ZINC000013683584	-11.25	488.926	4.7171	7	2	89.65	none	none	none	none	49	No	0.95604	1	129	0.692633	-0.0828675
fa{Pb@AF\DDadTRTraRTtRRRhpTdy[v@BfjZZ@B@@@	O=C(NCCc1c[nH]c2ccc(F)cc12)c1cc2ccccc2o1	ZINC000013727935	-10.24	322.338	3.5924	4	2	58.03	none	none	none	none	12	No	0.96809 (max of 6)	6	205; 222; 202; 117; 31; 213	-0.32434	0.0800686
fmoaR@JrLdjpQFQQIPjIQYIYSQITYjpXsW@AMS@EMUPDBGD	O=C1/C(=C/c2cccc(Cl)c2)Oc2cc(OC(=O)N3CCOCC3)ccc21	ZINC000013787169	-10.72	385.802	3.8758	6	0	65.07	none	none	none	none	19	Yes	1	1	346	0.0316916	0.494501
fa{H`@DBCdGlbbbbbRnTrTRSARTZs^mTCPDu@AP@@@	O=C(NCc1ccccn1)c1ccc2c(=O)n3c(nc2c1)CCC3	ZINC000015511559	-10.52	320.351	1.1569	6	1	74.66	none	none	none	none	35	Yes	0.86339	1	34	0.837784	-0.311809
e`RRLL@CKHcbGN`IABPpdLbdJbRrbVTTVRfbRtbcgfURqswuU@AMMUURD@UB@TjP@	O[C@@H]1C[C@@H](c2nc(-c3ccc(OC(F)(F)F)cc3)no2)N(Cc2c[nH]c3ccccc23)C1	ZINC000015674254	-10.96	444.412	3.6951	7	2	87.41	none	none	none	none	27	No	0.95385 (max of 5)	5	217; 302; 235; 182; 336	0.445041	-0.553537
ekhRL@@HBNA`HjldRbtTTRVRtrbRQpHtl|RZFvNiZhJ`hfB`JHPheb@@	COc1ccc(-c2noc([C@@H]3C[C@@H](O)CN3Cc3c[nH]c4ccccc34)n2)cc1	ZINC000015674692	-10.54	390.442	2.5261	7	2	87.41	none	none	none	none	27	No	0.95385 (max of 5)	5	197; 299; 288; 302; 235	0.299007	-0.716431
figq@@DFjCHheDhdhdicEeeF\gM^cZ``HBdB@B@@@	Cc1cc(C(=O)NCCc2c[nH]c3ccccc23)c2ccccc2n1	ZINC000017295740	-10.37	329.402	3.6999	4	2	57.78	none	none	none	none	11	Yes	0.87143 (max of 3)	3	258; 249; 315	0.497094	-0.338386
fegaP@F`IJITfYeUoU~{fRtxJViB`@BIjjBET@	CC(C)[C@@H](N)C(=O)Oc1ccc2c(=O)c(Oc3ccccc3)coc2c1	ZINC000020111215	-9.85	353.373	2.5489	6	1	87.85	none	none	none	none	48	Yes		0		0.676284	0.435845
ehZTBH@FkeCDb`ICHhheEhcLediieEDefICK@hmko`XHIF`@ijiB@HbBj@@	N[C@@H](Cc1c[nH]c2ccccc12)C(=O)Oc1ccc2c(=O)c(-c3ccccc3F)coc2c1	ZINC000020411573	-11.82	442.445	3.2679	6	2	94.41	none	none	none	none	55	Yes	1	1	135	0.540632	0.497891
ehZTBH@FkeCDb`ICHhheEhcLediieEDefICK@hmko`XHIF`@ijiB@HbBi@@	N[C@H](Cc1c[nH]c2ccccc12)C(=O)Oc1ccc2c(=O)c(-c3ccccc3F)coc2c1	ZINC000020411578	-11.99	442.445	3.2679	6	2	94.41	none	none	none	none	55	No	1	1	131	0.579306	0.339555
fak`P@J`QIVQQJJIQiQISIJgHijujYif@Bjh`Pu@	Cc1cc(O)c(C(=O)/C=C/c2ccc3c(c2)CN(C)CC3)c(=O)o1	ZINC000020411741	-10.58	325.363	1.2815	5	1	66.84	none	none	none	none	20	Yes		0		-0.120026	0.52514
ehRZLB@FEGLbiDc`IAzP~d@YAIe[{YUy]e]Zhx\|JjVv`BIjjjZ`@jhdPtWb@@	CN1C[C@@H](NC(=O)Nc2cccc(F)c2)C[C@H]1c1nc(-c2ccc(OC(F)(F)F)cc2)no1	ZINC000020464117	-10.53	465.406	3.7865	8	2	92.52	none	none	none	none	26	No	0.98413 (max of 10)	10	128; 107; 311; 146; 214; 61; 296; 299; 197; 336	0.674498	-0.665112
e`\ZLL@CKHfibGA`IABPpdLbdJbRrbVTTQRfTRTbcgfUSwuU@AMMUUM@@THARj@@	CN1C[C@@H](NC(=O)Nc2ccccc2)C[C@H]1c1nc(-c2ccc(OC(F)(F)F)cc2)no1	ZINC000020464127	-10.23	447.416	3.6857	8	2	92.52	none	none	none	none	26	No	0.98413 (max of 10)	10	217; 128; 107; 311; 146; 214; 61; 296; 299; 197	0.698576	-0.387794
e`RZD@@DLIDb`HlbbRbRTRRtVQTRTrTb`VQURvswsUUTEAIT@@ABBABTP@	CN1C[C@@H](NC(=O)NCc2ccccc2)C[C@H]1c1nc(-c2ccc3ccccc3c2)no1	ZINC000020464220	-10.88	427.507	3.4905	7	2	83.29	none	none	none	none	26	No	0.96181 (max of 9)	9	217; 197; 296; 128; 107; 311; 146; 214; 336	0.776137	-0.57502
fc h`@DXLgHHyEDeEDdedXedhdmNM[IU{Zjjjjij`@iDTUd@	CN1C[C@@H](NC(=O)NC2CCCCC2)C[C@H]1c1nc(Cc2ccccc2)no1	ZINC000020464249	-10.15	383.494	2.4961	7	2	83.29	none	none	none	none	26	No	0.91667 (max of 8)	8	217; 296; 61; 214; 146; 311; 128; 336	0.806579	-0.449566
fc h`@DXLgHHyEDeEDdedXedhdmNM[IU{ZhJBbij`@IDTUd@	CN1C[C@@H](NC(=O)Nc2ccccc2)C[C@H]1c1nc(Cc2ccccc2)no1	ZINC000020464258	-10.65	377.447	2.6491	7	2	83.29	none	none	none	none	26	No	0.92787 (max of 9)	9	217; 197; 296; 61; 214; 146; 128; 107; 336	0.703779	-0.543022
ehVRB@@DMBf`Lk`\bbTTRRTrRtVQTRTrTltLRjZzN^~AZ`hJB`dj@HhaI@aFH@	CN1C[C@@H](NC(=O)c2ccc3ccccc3c2)C[C@H]1c1nc(-c2ccc3c(c2)OCO3)no1	ZINC000020464366	-11.75	442.474	3.8986	8	1	89.72	none	none	none	none	26	No	0.90506 (max of 9)	9	217; 128; 311; 146; 214; 61; 296; 182; 336	0.54423	-0.751945
ek`TJ@@OI`FLnmlbbbbRRrRRLrTRrdLTtBbfVZBPhBBZij`D@@	COc1cc(CCC(=O)Nc2ccc(C(=O)c3cc4ccccc4o3)cc2)on1	ZINC000020745378	-11.11	390.394	3.6409	7	1	94.57	none	none	none	none	46	No	0.97727	1	153	-0.67298	-0.653117
fc I`@DL\tEEyEDhieDeEkEDeec^\DkQsZfBHhZP`JJ@@@	COc1ccc2[nH]cc(CCNC(=O)C(=O)Nc3cccc4[nH]ccc34)c2c1	ZINC000032123948	-10.34	376.415	1.8977	7	4	99.01	none	none	none	none	12	No	0.94444 (max of 6)	6	295; 213; 31; 117; 202; 222	-0.494298	-0.167305
ffspb@JVcsH@aJUvyVueRTLxLRujjX@ajZb`@@	O=C(c1ccc2c(=O)n3c(nc2c1)CCC3)N1CCSCC1	ZINC000032124518	-10.16	315.396	1.3281	5	0	78.28	none	none	none	none	35	No	0.86339	1	147	0.725101	-0.243003
ek`ZDH@AO@nagM`ICHhhdcEDhUeDeBdfNCK@hfnhBBjjZ`@jhd`dP@	COCCNc1cc(-c2noc([C@@H]3CCCN3Cc3ccccc3F)n2)ccn1	ZINC000035424547	-9.91	397.453	2.4146	7	1	76.31	none	none	none	none	32	Yes	0.92105 (max of 4)	4	85; 235; 302; 170	0.0986	-0.257237
eghRLD@I@hioAc`I@bPrJJKKJJIPkJIJ[IL\VNQI]SPPEUUMPAETRPJH@	COCCOc1cc(-c2noc([C@@H]3CCCN3Cc3ccc(F)c(F)c3)n2)ccn1	ZINC000035424771	-10.06	416.427	2.7984	7	0	73.51	none	none	none	none	32	No	0.92105 (max of 2)	2	85; 75	0.0652607	-0.0143292
e`ZVD@@JNKGDc`ODiWYWY]f_fUrJEMO@bfecgojj`@ffjjdHBJbBJ@@	c1ccc2c(CN3CCC[C@H]3c3nc(-c4ccc(N5CCOCC5)nc4)no3)c[nH]c2c1	ZINC000035425288	-10.15	430.51	2.4677	8	1	83.31	none	none	none	none	27	Yes	0.97959 (max of 5)	5	299; 182; 288; 75; 302	0.122748	-0.549452
ehVVD@@JNKGDc`ODiWYWY]f_fUTbaSSpHiiXyxFjh@IijjiBBHjHHh@@	Cn1cc(CN2CCC[C@H]2c2nc(-c3ccc(N4CCOCC4)nc3)no2)c2ccccc21	ZINC000035425322	-10.33	444.537	2.6005	8	0	72.45	none	none	none	none	27	No	0.97959 (max of 3)	3	182; 235; 302	0.348994	-0.399316
ehVZD@@HBNGN`BdiYyfU eeWg_@cRsrJkiZ{xFej`jBI`hJJjHhJH@@	c1ccc2c(CN3CCC[C@H]3c3nc(-c4ccc(OC5CCCCC5)nc4)no3)c[nH]c2c1	ZINC000035425508	-11.3	443.549	4.2844	7	1	80.07	none	none	none	none	27	No	0.92027 (max of 6)	6	85; 299; 182; 235; 288; 75	0.188379	-0.395573
fnkH`@HDyX@\dRbtTRRNRbRpSQg^jvej`hBjjhhT`@	c1cc(OC2CCCCC2)ncc1-c1noc([C@@H]2CCCN2)n1	ZINC000035425543	-10.83	314.388	2.574	6	1	73.07	none	none	none	none	30	Yes		0		-0.663033	0.42535
fmoY@@HDxxjpYHeEhhhdmmDdeC`fk^bv]KUATDAAQtDJP@	CNc1ccc(-c2noc([C@@H]3CCCN3Cc3cccc(C#N)c3)n2)cn1	ZINC000035426099	-9.46	360.42	2.2419	7	1	90.87	none	none	none	none	32	No	0.91571 (max of 3)	3	170; 75; 302	0.161041	-0.11935
fa{QA@IA|BPIHILsnroJj{NFmEMVpPEUUM@DPPL`@	Cc1ccc2oc([C@H]3CCN(Cc4ccc(F)c(F)c4)C3)nc2c1	ZINC000035446479	-10.04	328.361	4.2647	3	0	29.27	none	none	none	none	3	Yes	0.82482	1	364	0.244073	0.387621
fmopB`I^BBPIHCdIrByAIf]vUyUWZYpuhijvB@jjfh@jbBAd@	Fc1ccc(CN2CC[C@H](c3nc4ccc(C(F)(F)F)cc4[nH]3)C2)cc1F	ZINC000035446683	-11.1	381.347	4.3569	3	1	31.92	none	none	none	none	3	No	0.82482	1	76	0.399332	0.385448
figqB@AFZxDQdTRTraRTtRTrUFBedk^p@TuS@ASDP@@	Cn1ccc2cc(C(=O)NCCc3c[nH]c4ccc(Cl)cc34)ccc21	ZINC000036370102	-9.86	351.836	3.7642	4	2	49.82	none	none	none	none	6	Yes	0.8038	1	249	0.58511	0.0373608
e`R\D@@DJL`JlbbRTRbTRtRRQVtRRa`QTVWTswsUUPL`DPQ@AD@@@	O=C(Cn1ccc2ccc(OCc3ccccc3)cc21)NCCc1c[nH]c2ccccc12	ZINC000040309905	-10.12	423.515	4.0009	5	2	59.05	none	none	none	none	15	Yes		0		-0.711057	0.699953
fmoHb@AFbMpPQFQQISJEISSJJIQTXJWYcW@ASULtADID@@	O=C(NCCc1c[nH]c2ccc(Cl)cc12)C(=O)Nc1cccc2[nH]ccc12	ZINC000040312427	-10.67	380.834	2.5737	6	4	89.78	none	none	none	none	12	No	0.94828 (max of 7)	7	205; 222; 149; 295; 213; 31; 117	-0.37805	-0.0663271
fi{qb@AFbxMPQFQQISJEISSJJKTXJWQp@TuSMA@D@@@	O=C(NCCc1c[nH]c2ccc(Cl)cc12)C(=O)Nc1ccccc1O	ZINC000040313298	-10.25	357.796	2.1886	6	4	94.22	none	none	none	none	12	No	0.94828 (max of 7)	7	205; 295; 213; 31; 117; 202; 149	-0.701928	0.0532292
ekhXF@@I`E@dbnlbbbbbRRvfRRtLRXTL|\bJZvNZd@`@bjfjhJ`F`@	O=C(Oc1ccc2c(=O)c(-c3ccc4c(c3)OCCO4)coc2c1)[C@@H]1CCCN1	ZINC000061992926	-11.29	393.394	2.3798	7	1	83.09	none	none	none	none	43	Yes		0		-0.236074	-0.841226
e`RZDH@ACKFohl`ICHhdiidhUEDdTeDeMQqhXedUT\}@D@AUUUT@QaPPxoHdjd@@	N#Cc1cccc(CN[C@H]2CO[C@@H]3[C@@H](Nc4nccc(-c5cccc(F)c5)n4)CO[C@H]23)c1	ZINC000067902088	-11.2	431.47	1.9031	7	2	92.09	none	none	none	none	22	No	0.99083 (max of 8)	8	4; 232; 187; 181; 68; 27; 273; 111	-0.590488	-0.290446
egdZDH@ACKFihl`ICHhdiidhUEDdTeDeQqhXedUT]]@D@AUUUT@@TDNKrIJi@@	Fc1cccc(-c2ccnc(N[C@H]3CO[C@@H]4[C@@H](NCc5ccccn5)CO[C@H]34)n2)c1	ZINC000067902090	-10.76	407.448	1.1206	7	2	81.19	none	none	none	none	22	No	0.99083 (max of 8)	8	187; 4; 232; 103; 111; 273; 27; 181	-0.705667	-0.362627
fnsH`@DDlDGdfUvUumeZLtZkVjX@JZ@B@@@	O=C1CCC(c2ccc(NC(=O)Nc3ccccc3)cc2)=NN1	ZINC000068571954	-11.82	308.34	2.555	6	3	82.59	none	none	none	none	42	Yes		0		-0.316453	-0.715168
fc a@DF@YJSLjsjwZl{bu[uQkvtD@@QA@@@@@@@	O=C(C[n+]1cccc(Cc2ccccc2)c1)c1ccc(-c2ccccc2)cc1	ZINC000068586161	-9.74	364.467	1.0198	2	0	20.95	none	none	none	none	2	Yes	0.94444	1	237	0.187577	0.54739
ehZ^H@@DKGODna`LbbRRTTTRbRrrQffR\|BRJzZf~AZjiiiBXJJ@Bd@@@	CN(c1ccccc1)c1ncnc2c(CCC(=O)NCCc3c[nH]c4ccccc34)cnn12	ZINC000071404964	-10.63	439.522	2.1424	8	2	91.21	none	none	none	none	53	Yes		0		-0.0809599	-0.83327
fi{h`@DTeZhCYEDhddmBdhhdmKVZ}FuAACURD@P@@	O=C(CCNC(=O)c1cnccn1)NCCc1c[nH]c2ccccc12	ZINC000072325199	-10.02	337.382	0.5763	7	3	99.77	none	none	none	none	51	No	0.85207 (max of 2)	2	117; 149	-0.557515	0.323042
fmoq`@DVj@t|bbTRRVaRTTRVVIRVluzMjBBFjdHBhbAD@	COc1ccc2[nH]cc(CCNC(=O)C[C@@H]3NC(=O)c4ccccc43)c2c1	ZINC000072325753	-10.67	363.416	2.354	6	3	83.22	none	none	none	none	44	Yes		0		-0.203214	0.718846
fmoi@@DNcUhDfVUWeeWg^VoQKvZvhHHfB`@@H@@@	O=C(NCCc1c[nH]c2ccccc12)c1ccc(Nc2ncccn2)cc1	ZINC000079188740	-10.58	357.416	3.3227	6	3	82.7	none	none	none	none	11	No	0.86765 (max of 3)	3	114; 315; 53	0.562207	-0.191318
fnkP`@DQAWHhdhdeELdeJeVCfJZmZhH@HIJ`h@@	O=C(CCc1ccc2c(c1)CCO2)Nc1ccc2[nH]ccc2c1	ZINC000079189931	-10.39	306.364	3.5248	4	2	54.12	none	none	none	none	9	Yes		0		-0.467579	-0.707191
		Table S1. The docking scores, pharmacological properties and clustering information of the selected 111 compounds. Name labeled with colors were compounds evaluated in vitro, and blue and green ones were incapable and capable of uncoupling PD-1/PD-L1 interaction in AlaphaLISA assay, respectively.
